# Supplementary material for: A “jellyfish” shaped green emitting gallium(iii)-containing metallomesogen
Source: Royal Society of Chemistry journal article supplement (doi:10.1039/b800030a), 2008-01-01
Supplement: b800030a.pdf [file b800030a.pdf]

## A “jellyfish” shaped green emitting gallium(III)-containing metallomesogen

Daniela Pucci,\* Iolinda Aiello, Anna Bellusci, Alessandra Crispini, Irene De Franco, Mauro Ghedini and Massimo La Deda

*Centro di Eccellenza CEMIF.CAL, LASCAM, CR-INSTM Unità INSTM della Calabria and Laboratorio Regionale Licryl CNR-INFM, Dipartimento di Chimica, Università della Calabria, 87030 Arcavacata di Rende (CS), Italy. Fax: 39 0984 492066; Tel: 39 0984 492064; E-mail: d.pucci@unical.it*

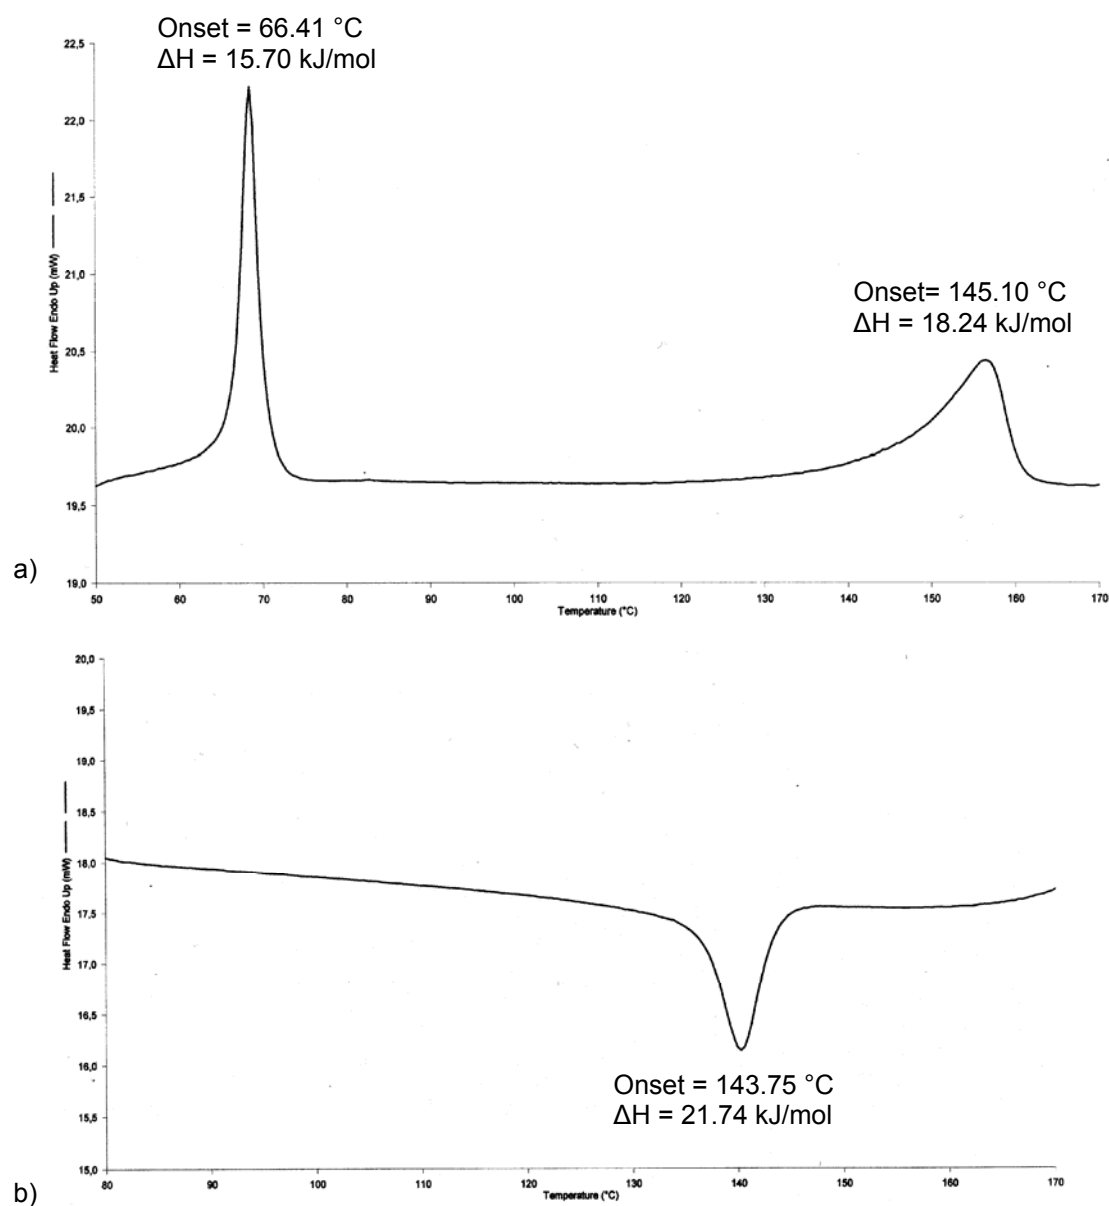

**Figure S1.** DSC thermograms for the complex **GaQ<sub>2</sub>L**: a) heating and b) cooling scan.

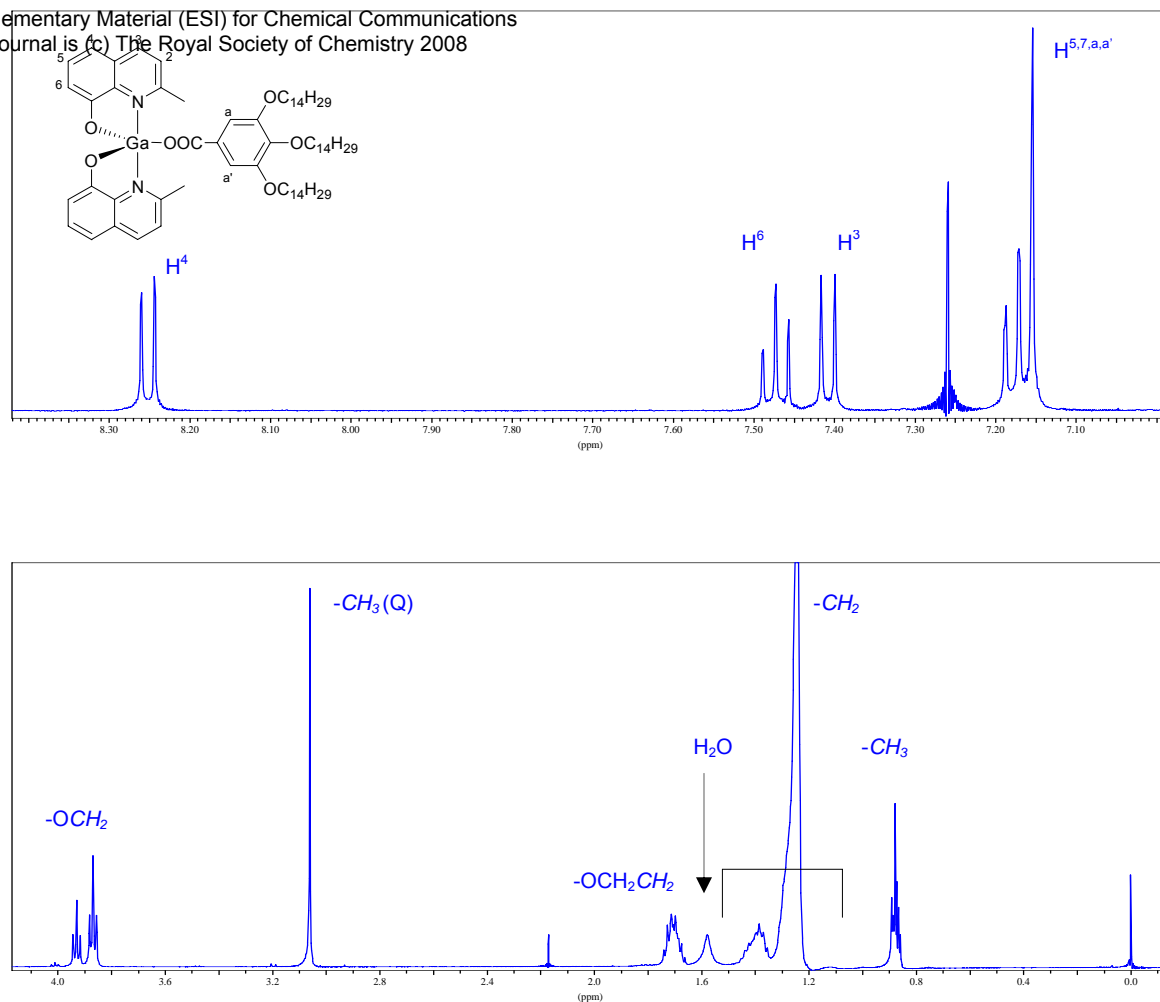

**Figure S2.** Proton numbering scheme and <sup>1</sup>H NMR spectrum of GaQL, in CDCl<sub>3</sub>.
